# Supplementary material for: High c-Myb Expression Associates with Good Prognosis in Colorectal Carcinoma
Source: PubMed Central journal article supplement — J Cancer. 2019 Feb 23;10(6):1393–7. doi: 10.7150/jca.29530 (PMC6485226; doi:10.7150/jca.29530), 2019-02-23
Supplement: jcav10p1393s1.pdf [file jcav10p1393s1.pdf]

**Supplementary table 1. Prognostic Impact of MYB Expression on Survival in the PrognosScan Database\***

| Dataset  | Endpoint                  | Cohort / Contributor | Array Type     | Probe ID  | No. of Patients | Cut-point | Minimum P Value | Corrected P Value | ln(HRhigh/HRlow) | Cox P Value | ln(HR) | HR (95% CI)        |
|----------|---------------------------|----------------------|----------------|-----------|-----------------|-----------|-----------------|-------------------|------------------|-------------|--------|--------------------|
| GSE17536 | Disease Specific Survival | MCC/Smith            | HG-U133_Plus_2 | 204798_at | 177             | 0.15      | 0.011848        | 0.183288          | -0.77            | 0.005184    | -0.40  | 0.67 [0.50 - 0.89] |
| GSE17536 | Overall Survival          | MCC/Smith            | HG-U133_Plus_2 | 215152_at | 177             | 0.54      | 0.008905        | 0.147911          | -0.63            | 0.026171    | -1.03  | 0.36 [0.14 - 0.89] |
| GSE17536 | Overall Survival          | MCC/Smith            | HG-U133_Plus_2 | 204798_at | 177             | 0.10      | 0.022432        | 0.290409          | -0.72            | 0.025300    | -0.30  | 0.74 [0.56 - 0.96] |
| GSE17536 | Disease Free Survival     | MCC/Smith            | HG-U133_Plus_2 | 204798_at | 145             | 0.37      | 0.017053        | 0.239186          | -0.78            | 0.033815    | -0.49  | 0.61 [0.39 - 0.96] |
| GSE17536 | Disease Specific Survival | MCC/Smith            | HG-U133_Plus_2 | 215152_at | 177             | 0.41      | 0.000362        | 0.010753          | -0.95            | 0.011368    | -1.40  | 0.25 [0.08 - 0.73] |
| GSE17537 | Overall Survival          | VMC/Smith            | HG-U133_Plus_2 | 204798_at | 55              | 0.13      | 0.000713        | 0.019166          | -1.52            | 0.075207    | -0.41  | 0.67 [0.43 - 1.04] |
| GSE17537 | Overall Survival          | VMC/Smith            | HG-U133_Plus_2 | 215152_at | 55              | 0.53      | 0.002251        | 0.049903          | -1.55            | 0.065410    | -1.94  | 0.14 [0.02 - 1.13] |
| GSE14333 | Disease Free Survival     | Melbourne/Jorissen   | HG-U133_Plus_2 | 215152_at | 226             | 0.19      | 0.000157        | 0.005213          | -1.05            | 0.121368    | -0.19  | 0.83 [0.65 - 1.05] |
| GSE14333 | Disease Free Survival     | Melbourne/Jorissen   | HG-U133_Plus_2 | 204798_at | 226             | 0.12      | 0.000017        | 0.000727          | -1.30            | 0.000269    | -0.67  | 0.51 [0.36 - 0.73] |

HR indicates hazard ratio; CI, confidence interval;

\*Studies were identified in a search performed July 19, 2018.

**Supplementary table 2. Prognostic Impact of *MYB* Expression on Survival in the SurvExpress Database\***

| Dataset                     | Endpoint              | Cohort / Contributor                 | No. of Patients | Concordance Index | Log-Rank Equal Curves P value | HR (95% CI)      | Beta   | Cox P value (Beta) | P value (DEG) |
|-----------------------------|-----------------------|--------------------------------------|-----------------|-------------------|-------------------------------|------------------|--------|--------------------|---------------|
| COADREAD                    | Survival              | TCGA Colon and Rectum adenocarcinoma | 466             | 0.61              | 0.0485                        | 1.5 (1-2.25)     | -1.057 | 0.00086217         | 3.55e-66      |
| GSE14333                    | Disease Free Survival | Jorissen Sieber                      | 226             | 0.6               | 0.0356                        | 1.83 (1.03-3.24) | -0.668 | 0.00026784         | 4.83e-45      |
| GSE17536                    | Survival              | Smith Beauchamp                      | 177             | 0.57              | 0.0474                        | 1.59 (1-2.53)    | -0.340 | 0.01197088         | 1.58e-30      |
| Colon-Metabase-Uniformized  | Disease Free Survival |                                      | 545             | 0.57              | 0.1635                        | 1.28 (0.9-1.83)  | -3.705 | 0.00000137         | 3.62e-40      |
| GSE24551                    | Recurrence            | Sveen-Agesen                         | 189             | 0.59              | 0.4633                        | 1.22 (0.72-2.07) | -0.428 | 0.00126840         | 5.17e-30      |
| GSE41258                    | Survival              | Sheffer-Domany                       | 243             | 0.57              | 0.2215                        | 1.28 (0.86-1.9)  | -0.315 | 0.00023933         | 3.21e-35      |
| Colon Rectal Adenocarcinoma | Survival              | TCGA                                 | 151             | 0.67              | 0.0277                        | 3.09 (1.07-8.96) | -0.474 | 0.04887556         | 3.82e-25      |
| GSE12945                    | Survival              | Staub                                | 62              | 0.66              | 0.1193                        | 2.52 (0.76-8.38) | -1.208 | 0.04786045         | 5.85e-13      |

HR indicates hazard ratio; CI, confidence interval; Beta,  $\beta$ -coefficient; DEG, differentially expressed gene

\*Studies were identified in a search performed July 9, 2018.
